# Supplementary material
Source: publisher figshare collection journal article supplement (https://tandf.figshare.com/ndownloader/files/2365583)
Supplement: Supplementary file 1 [file 2365583]

Supplementary information for Zegers et al., Imaging of tumour hypoxia and metabolism in patients with head and neck squamous cell carcinoma, Acta Oncol, 2015; doi:10.3109/0284186X.2015.1062913

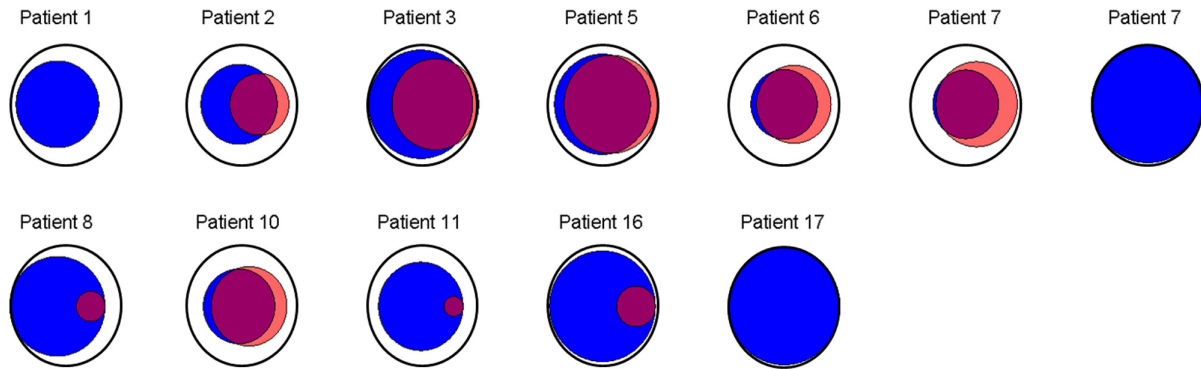

Supplementary Figure 1. Visual representation of the overlap of  $[^{18}\text{F}]\text{FDG}$  high fraction (blue) and  $[^{18}\text{F}]\text{HX4}$  high fraction (red) for the metastatic lymph nodes (black) of all patients.

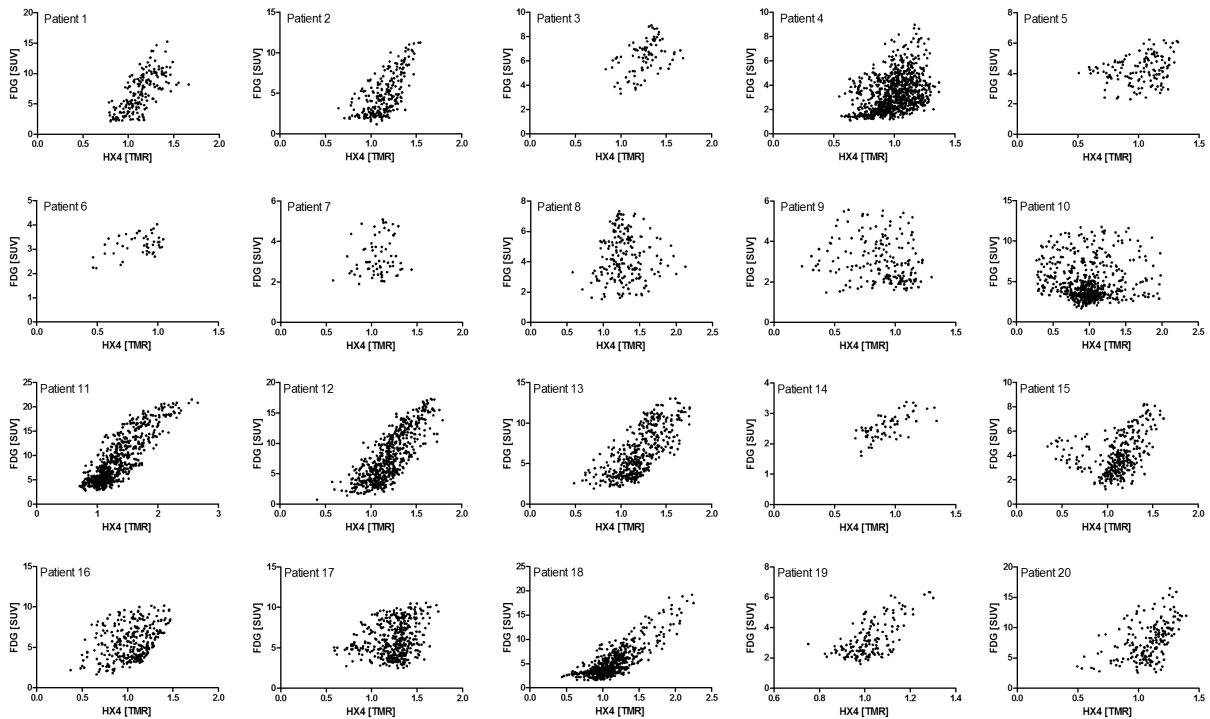

Supplementary Figure 2. Voxel wise comparison of the  $[^{18}\text{F}]\text{HX4}$  (tumour-muscle ratio) and  $[^{18}\text{F}]\text{FDG}$  PET (SUV) uptake within the primary lesions.
